# Supplementary material for: La-modified mesoporous Mg–Al mixed oxides: effective and stable base catalysts for the synthesis of dimethyl carbonate from methyl carbamate and methanol
Source: Royal Society of Chemistry journal article supplement (doi:10.1039/c5cy01712b), 2015-11-03
Supplement: c5cy01712b1.pdf [file c5cy01712b1.pdf]

**Table S1** comparison of the catalytic performance of HTC-5La with other reference catalysts for the DMC synthesis.

| Catalyst                                             | Starting feed   | Urea or MC conversion (%) | DMC selectivity (%) | DMC yield (%) | NMMC yield (%) | Reference |
|------------------------------------------------------|-----------------|---------------------------|---------------------|---------------|----------------|-----------|
| ZnCl <sub>2</sub>                                    | MC + methanol   | 50.9                      | 66.0                | 33.6          | 9.1            | [28]      |
| LaCl <sub>3</sub>                                    | MC + methanol   | 84.8                      | 63.3                | 53.7          | 14.1           | [29]      |
| ZnO                                                  | Urea + methanol | 100.0                     | 29.0                | 29.0          | 14.6           | [19]      |
| ZnO                                                  | MC + methanol   | 7.1                       | 5.4                 | 3.8           | 0              | [24]      |
| CaO                                                  | MC + methanol   | 44.3                      | 39.5                | 17.5          | Not provided   | [12]      |
| Fe <sub>2</sub> O <sub>3</sub> /HMCM-49              | Urea + methanol | 34.2                      | 97.4                | 33.3          | Not provided   | [18]      |
| Zn/Al mixed oxide                                    | Urea + methanol | Not provided              | Not provided        | 36.5          | Not provided   | [22]      |
| Zn/Fe mixed oxide                                    | MC + methanol   | 46.1                      | 66.6                | 30.7          | 7.1            | [30]      |
| ZnO-CeO <sub>2</sub> -La <sub>2</sub> O <sub>3</sub> | Urea + methanol | 100.0                     | 50.4                | 50.4          | 6.7            | [23]      |
